# Supplementary material
Source: MDPI journal article supplement (https://www.mdpi.com/2073-4395/14/2/300)
Supplement: s1 [file s1]

Table S1. The locations where the wheat genotypes used in the study were collected.

| No | Latitude and longitude    | No | Latitude and longitude    | No | Latitude and longitude         |
|----|---------------------------|----|---------------------------|----|--------------------------------|
| 1  | 38°02'35.0"N 40°03'54.2"E | 21 | 40°36'12.6"N 43°01'31.7"E | 41 | 37°51'29.9"N 38°18'55.5"E      |
| 2  | 38°17'07.5"N 35°35'10.7"E | 22 | 39°42'10.7"N 39°23'15.4"E | 42 | 39°15'25.5"N 37°23'16.5"E      |
| 3  | 40°44'16.4"N 43°25'27.1"E | 23 | 40°45'10.5"N 43°24'26.2"E | 43 | 39°57'49.4"N 37°40'11.0"E      |
| 4  | 38°12'50.6"N 37°15'33.4"E | 24 | 38°15'35.5"N 35°37'30.8"E | 44 | 41°21'31.2"N 32°48'59.2"E      |
| 5  | 41°23'28.1"N 33°43'17.3"E | 25 | 40°36'43.2"N 43°07'47.2"E | 45 | 39°52'52.0"N 36°36'01.7"E      |
| 6  | 37°44'48.3"N 32°23'54.0"E | 26 | 41°41'24.9"N 33°38'29.0"E | 46 | 40°50'05.8"N 43°15'05.4"E      |
| 7  | 41°20'46.7"N 33°47'11.2"E | 27 | 41°22'46.6"N 33°50'45.9"E | 47 | 37°13'49.7"N 34°41'26.8"E      |
| 8  | 38°17'25.2"N 33°51'13.8"E | 28 | 40°44'56.6"N 43°23'53.6"E | 48 | 41°30'44.0"N 34°13'14.3"E      |
| 9  | 38°36'11.3"N 43°29'18.5"E | 29 | 40°05'27.3"N 33°26'10.1"E | 49 | 40°00'20.2"N 44°18'17.9"E      |
| 10 | 41°27'15.7"N 33°24'31.6"E | 30 | 38°17'16.4"N 35°35'35.9"E | 50 | 37°13'00.5"N 38°48'19.4"E      |
| 11 | 38°06'05.2"N 35°39'34.7"E | 31 | 38°07'56.4"N 34°40'51.5"E | 51 | 38°33'42.7"N 43°30'08.0"E      |
| 12 | 38°36'00.9"N 36°13'19.9"E | 32 | 40°46'32.4"N 43°31'20.0"E | 52 | 36°44'21.5"N 33°53'07.8"E      |
| 13 | 41°26'06.7"N 33°49'20.9"E | 33 | 40°45'51.7"N 43°24'27.8"E | 53 | 37°45'25.5"N 32°33'24.6"E      |
| 14 | 38°11'17.1"N 35°40'16.6"E | 34 | 41°01'30.4"N 34°04'19.4"E | 54 | 40°43'36.5"N 43°30'32.3"E      |
| 15 | 36°33'30.4"N 33°46'04.0"E | 35 | 40°46'26.3"N 43°30'56.6"E | 55 | Bahri Dagdas IARI <sup>1</sup> |
| 16 | 38°22'28.7"N 35°27'12.7"E | 36 | 37°26'26.3"N 40°41'04.8"E | 56 | GAP IARTC <sup>2</sup>         |
| 17 | 39°49'50.7"N 43°47'52.8"E | 37 | 39°47'54.4"N 35°09'51.9"E | 57 | GAP IARTC                      |
| 18 | 40°46'09.6"N 43°31'28.7"E | 38 | 38°52'57.2"N 35°14'20.5"E | 58 | GAP IARTC                      |
| 19 | 38°36'29.4"N 43°36'48.9"E | 39 | 39°27'50.8"N 36°40'05.3"E |    |                                |
| 20 | 41°18'38.7"N 33°22'47.0"E | 40 | 38°14'14.9"N 32°12'16.4"E |    |                                |

<sup>1</sup>IARI International Agricultural Research Institute, <sup>2</sup>IARTC International Agricultural Research and Training Center.
